# Supplementary material for: Effects of Different Levels of Intraocular Stray Light on Kinetic Perimetry Findings
Source: PLoS One. 2015 May 12;10(5):e0127159. doi: 10.1371/journal.pone.0127159 (PMC4429102; doi:10.1371/journal.pone.0127159)
Supplement: S1 File — (XLSX) [file pone.0127159.s001.xlsx]

## Sheet: Sheet1
																																				Kinetic sensitivity at each meridian (non filter)
Age	M/F	R/L	Axial	IOP	Sph	Cly	SE	Viaual Acuity LogMAR				pupil diamiter				Isopter area III4e				Isopter area I4e				Isopter area I3e				Isopter area I2e				Isopter area I1e				III4e	III4e	III4e	III4e	III4e	III4e	III4e	III4e	III4e	III4e	III4e	III4e	III4e	III4e
								non filter	density 0.8	density 0.4	density 0.1	non filter	density 0.8	density 0.4	density 0.1	non filter	density 0.8	density 0.4	density 0.1	non filter	density 0.8	density 0.4	density 0.1	non filter	density 0.8	density 0.4	density 0.1	non filter	density 0.8	density 0.4	density 0.1	non filter	density 0.8	density 0.4	density 0.1	0°	15°	30°	45°	60°	75°	90°	105°	120°	135°	150°	165°	180°	195°
21	F	L	23.9	13.2	-2.75	-1.5	-3.5	-0.166015	0	0.15048	0.391275	6.851	6.129	6.971	5.555	11710.9	12131.2	11365.1	11665.6	8241.3	7911.7	6524.9	6424.8	4801.6	3851.1	2665.4	2284.3	1802.1	1418.2	712.5	407.5	412.9	121.7	0	0	51.261	50.745	53.577	50.226	50.038	46.451	44.365	45.027	50.325	60.791	70.339	81.854	80.455	83.648
21	F	R	24.61	14.3	-4.25	-0.75	-4.625	-0.166015	0.216373	0.391275	0.69301	6.528	7.037	5.3	7.074	13798.4	14041	13055.9	13778.5	9867.6	9653.6	7925.3	8042.5	5635.4	3432.3	3280.9	2680.3	1831.1	539.7	381.9	0	192.4	0	0	0	55.539	56.686	55.969	56.569	54.618	50.211	47.385	49.938	57.877	67.991	76.158	85.049	86.31	85.129
21	F	L	24.37	12.7	-3.75	-1.25	-4.375	-0.0754669	0.0441067	0.294784	0.516252	6.877	6.247	7.014	6.795	14102.9	13692.6	13820.6	14006.1	9590.9	7795.6	8207	8091.1	5340.6	4391.9	3434.3	2745.8	1931	812.6	445	0	340	33.6	0	0	61.597	59.618	60.909	56.569	62.661	56.464	55.362	57.899	62.555	70.572	82.942	86.358	86.706	86.605
21	F	L	23.84	12.7	-2	-0.75	-2.375	-0.166015	0.0937757	0.294784	0.391275	5.971	6.722	6.384	6.197	12977.7	13114.5	13044.7	13503.6	8965.6	9008.4	8630.6	8379	5429.6	5053.8	4317	4227	2570.9	1523.3	538	673.8	230.9	76.4	0	0	51.782	54.418	53.478	49.003	47.652	52.134	45.736	48.598	51.517	66.216	79.346	84.428	86.511	85.067
21	F	R	24.3	13	-1.75	-0.25	-1.875	-0.278943	0.216373	0.391275	0.69301	6.4	5.8	6.2	6.641	14629.8	14458.8	14305.8	14267.2	9417.9	8174.9	6959.6	7001.7	5795.5	4030.1	3294.8	3320.5	2828.8	1536.4	172	256.8	282.2	50.3	0	0	57.594	58.098	59.438	61.367	58.323	58.195	55.542	58.931	65.368	78.994	85.275	88.736	88.994	89.04
21	F	R	26.36	10	-4.5	-0.25	-4.625	-0.0754669	0	0.216373	0.516252	5.893	4	4.445	3.926	13916.7	12894.1	13761.2	13079.8	9685.2	8412.1	8502.9	7457.8	6045.8	4598.2	2710.1	3004.5	1691.4	1105.7	108.8	17.1	165.4	86.5	0	0	57.334	59.797	58.259	57.826	56.468	53.338	56.593	56.511	59.666	67.046	71.63	84.055	87.112	81.928
21	F	R	22.72	10.7	0	-1	-0.5	-0.166015	0.0441067	0.294784	0.69301	3.327	5.273	5.164	4.282	10907	11401.9	11229.6	10531	8481.5	8312.2	7759.5	6714.1	6049.9	5814.2	4215.9	4382.5	2526.8	1673.5	1262.4	627.7	238.1	96.6	51.1	0	54.103	52.981	46.114	44.252	39.654	37.138	37.303	36.976	39.136	51.772	60.836	74.409	80.616	82.155
21	F	R	23.59	15.3	-0.5	-0.75	-0.875	-0.166015	0.15048	0.294784	0.69301	4.057	3.429	4.152	4.419	13761.6	13989.8	13842.6	14588.3	10534.2	10630.9	8910.7	9685.2	6669.5	6028.4	4627.7	4701.5	2779.9	2112.7	516.6	277.9	278.1	124.5	0	0	59.23	61.611	60.741	51.783	49.537	45.081	40.309	45.582	52.458	59.397	73.067	86.842	86.922	86.099
23	F	R	24.69	13.7	-4	-0.5	-4.25	-0.166015	0.0937757	0.391275	0.516252	5.184	5.221	5.74	5.388	12677.7	12591.3	12793.3	12504.1	9846.1	9149.6	8588.4	7302.6	6728.6	6037.7	4446.3	4243.8	2873.4	2120.8	919.5	650.1	781.2	208.7	0	0	55.342	57.689	52.915	54.042	47.628	45.765	47.281	47.954	55.28	61.386	67.298	77.01	86.193	88.158
21	F	L	26.84	13	-6	0	-6	-0.166015	0.0441067	0.391275	0.69301	4.647	5.48	5.425	4.895	13071.1	13321.6	13453.1	12385.9	8299.7	8010.6	7747.7	7148.4	4710.3	4621.8	4229.8	2912.2	1837.6	1185.5	988.4	648.9	273.3	93.3	19.8	0	58.223	58.718	57.533	57.617	55.367	49.778	50.518	51.831	55.402	64.32	73.391	81.403	84	82.261
21	F	R	25.34	14	-3.5	-0.5	-3.75	-0.166015	0.15048	0.15048	0.516252	6.355	5.645	6.476	5.495	13806.1	13612.9	13500.3	13485.1	9862.9	9341.1	8771.8	8726.8	6774.9	6354.7	5201.7	4905.7	3454.6	3292.5	2022.2	987	943.9	591.7	37.3	5.7	56.738	56.29	55.627	54.918	54.934	54.045	50.382	53.854	61.452	66.757	72.799	84.719	85.108	84.799
21	F	R	25.35	11.7	-5.5	-0.5	-5.75	-0.166015	0.0441067	0.216373	0.516252	6.001	5.181	5.181	5.181	14120.1	13995.6	13243.7	13410	9910.9	9706.2	8482	8156.7	6181.9	6321.2	4900.3	4339.8	2558.6	1970.8	1159.1	484.5	245.8	146.8	7.6	0	61.955	62.517	63.837	62.891	54.644	52.798	50.458	55.251	58.138	72.715	69.48	86.577	82.873	88.51
21	F	L	23.19	16	-2	-0.5	-2.25	-0.166015	0.15048	0.294784	0.391275	8.171	6.571	5.943	6.857	14573.2	14471.9	13855.8	14617.7	10482.9	9925.9	9051.6	8767	7051.1	5283.3	5137.9	3635.3	3001.6	1854.4	1014.1	462.4	919.8	174.8	0	0	64.68	64.951	62.979	61.975	58.467	57.043	54.057	55.496	59.803	75.121	80.128	84.887	87.334	87.545
22	F	R	24.28	11.7	-5	-0.5	-5.25	-0.166015	0.216373	0.516252	0.69301	5.221	5.484	4.646	6.017	10205.6	11204.5	10323.2	11107.7	7440.7	8400	6990	7340.8	4617.2	5449.3	4130.9	3430.2	1956.1	2227.9	1397.9	384.4	207.7	198.1	0	0	55.556	54.119	52.137	51.121	42.742	40.7	37.778	43.834	46.656	56.674	64.869	66.267	70.371	81.183
22	F	R	24.56	11.7	-1.75	-0.25	-1.875	-0.0754669	0	0.0441067	0.294784	6.931	5.598	6.931	6.207	14181.2	13419.7	14305.6	12632.3	10708.9	9920.7	9239.5	7946	6798	6059	5131.8	4164.8	3235.1	2238.8	1387.7	633.5	636.3	140.9	10.9	0	66.191	60.295	61.036	54.999	53.04	47.794	45.084	50.606	56.8	66.334	85.328	89.335	90.16	89.753
22	F	L	25.5	14	-0.25	-1.25	-0.875	-0.278943	-0.0754669	0.0441067	0.294784	5.998	6.053	6.812	5.359	14940.6	14766.8	14418.5	14584.4	10073.6	9895	8494.4	8182.4	6081	5755.5	4181.2	3229.1	2656.2	2158.8	651.2	127.2	407.1	165.4	0	0	60.308	60.154	60.167	60.92	59.403	57.037	54.924	58.495	63.945	71.038	79.346	83.443	86.616	85.763
20	F	R	23.74	15	-2.75	-0.25	-2.875	-0.278943	0	0.0937757	0.516252	5.167	4.963	5.139	4.305	15206.6	14792.6	13544	14246.4	11046.7	10035.4	9103.3	7997.6	6525.7	4898.6	2477.9	877.2	2010	707.8	36.7	0	338.6	0	0	0	62.77	65.942	63.909	62.119	52.305	57.227	49.233	54.758	61.884	72.778	84.805	85.643	85.695	85.061
21	F	L	25.88	13.3	-10	-0.25	-10.125	-0.0754669	0.0441067	0.294784	0.294784	5.056	5.815	5.444	4.694	12854.4	12544.2	12959.9	13122.3	9470.7	9191.1	8822.5	8606.8	6222.5	5446	5133.3	4596.8	2238.4	2358	1676.8	1163.3	358.5	298.5	0	0	54.769	57.168	57.24	57.248	57.436	56.917	53.494	56.852	60.527	67.973	77.044	80.499	78.083	79.509
20	M	R	25.14	12.7	-4.25	-0.25	-4.375	-0.166015	-0.0754669	0.15048	0.391275	6.166	6.222	6.037	5.972	13258.4	13574.8	13727.1	13111	9739.9	9391.5	8438	8448.7	6623.5	5706.7	4341.1	4728.8	2587.7	2225	557.3	986.1	486.8	124.8	0	0	55.038	58.253	58.767	56.239	56.424	50.366	53.023	52.856	57.094	62.159	67.327	79.195	86.356	84.958
21	F	L	26.63	9.7	-7.25	-0.75	-7.625	0.0441067	0.0937757	0.391275	0.69301	4.018	6.263	6.555	4.472	12817.8	13902.2	13487.4	13812.8	9677.2	8857.9	7913.7	7819.5	6419.5	5305.9	4525.7	3733	2789.9	1505.4	665.3	232.9	345.4	116.1	0	0	48.061	59.571	52.786	52.731	50.767	50.433	46.512	50.152	56.078	59.857	73.978	75.97	84.341	86.535
23	M	L	24.51	15	0	-0.75	-0.375	0	0.216373	0.294784	0.69301	6.215	4.851	4.68	6.166	13513.2	14089.4	14334.9	13972.3	9818.7	9684	9551.9	8548.7	6806.4	6430.6	5344	4636.1	2597.7	2236	951.5	632.2	305.6	141.8	0	0	55.259	55.885	55.698	55.835	56.211	49.481	48.889	52.462	54.686	60.654	69.902	83.769	85.186	84.409
22	F	R	24.62	18	-3	-0.5	-3.25	-0.0754669	0.321489	0.294784	0.516252	6.29	6.111	5.945	6.235	13159.6	13100.6	12806.6	13633.3	10060	10182.9	9097.6	9294.9	7033.5	6360.7	5558.4	4038.5	2985	1820.2	785.5	219.7	438.1	42.1	0	0	53.386	56.741	56.373	54.568	45.786	45.953	45.67	46.077	54.791	62.025	76.257	88.011	86.458	87.444
23	F	R	25.5	12.3	-3.5	-1	-4	-0.0754669	0.0937757	0.216373	0.516252	4.58	5.738	4.322	4.947	13524.4	14421.5	14331	13663.3	10200.7	10482.4	9481.9	8594.1	6424.4	6999.3	4400	4568.1	1913.6	1938	410.3	563.2	84	83.6	0	0	55.704	58.757	51.286	53.216	47.593	49.921	53.481	54.639	64.094	67.987	84.344	86.317	86.815	84.952
22	M	R	24.75	9.3	-1.75	-0.25	-1.875	-0.0754669	0.0937757	0.294784	0.516252	7.329	4.6	7.182	6.628	12023.5	11626.8	11315.2	11645.4	8077	8023.5	6644.5	6598.2	5334.6	4970.9	3737.7	2838.6	2149.6	1775.6	912.9	372.3	431.3	51.6	0	0	51.907	54.539	55.008	48.973	49.937	48.117	47.936	53.688	54.479	66.856	72.281	80.797	83.373	83.428
37	F	L	24.28	10.7	-1.75	-0.75	-2.125	-0.166015	0.0441067	0.216373	0.69301	5.462	5.26	5.756	4.869	14421.8	14617	14083.9	13726.7	10234.5	9491.6	9531.5	7913	7511.2	6288.8	4695.6	3863.7	2959.9	1713	808.7	142.3	66.8	64.9	0	0	63.623	60.005	59.967	62.471	59.773	58.798	54.331	58.167	62.916	69.486	78.545	88.163	88.504	89.087
[truncated: 466 more columns]
